# Supplementary material for: Construction of first anion-assisted helix inside a helix network
Source: Royal Society of Chemistry journal article supplement (doi:10.1039/b919235m), 2009-10-07
Supplement: b919235m.pdf [file b919235m.pdf]

### **Supporting Information**

## **Title: Construction of First Anion-Assisted Helix inside a Helix Network**

***Authors:*** Tannistha Basu, Raju Mondal\*

***Journal:*** CrystEngComm

---

### ***Experimental:***

#### **Materials and general methods**

Methylene bis (3,5-dimethylpyrazole) (H<sub>2</sub>MDP) was synthesized via a published procedure<sup>9</sup>. All reagents and chemicals were purchased from commercial sources and were used without further purification. FT-IR spectra were obtained on a Nicolet MAGNA-IR 750 spectrometer with samples prepared as KBr pellets. C, H and N microanalyses were carried out with a 2400 Series-II CHN Analyzer, Perkin–Elmer, USA.

#### ***Syntheses of 1 & 2:***

##### **Synthesis of 1 :**

In a methanolic solution of H<sub>2</sub>MDP, HTFA (0.001M aqueous solution) was added drop wise and stirred for 30 min. The solution was then kept in a CaCl<sub>2</sub> desiccator. After few days colorless block shaped crystals of compound **1** were separated out with 60% yield based on H<sub>2</sub>MDP.

Anal.calcd (found) for C<sub>15</sub>H<sub>18</sub>F<sub>6</sub>N<sub>4</sub>O<sub>4</sub> (**1**) (%): C, 41.67 (41.00); H, 4.20 (3.80); N, 12.96 (12.55); O, 14.80 (14.68); F, 26.37 (26.30).

IR (400-4000cm<sup>-1</sup>): 3310m, 2929.67w, 1676.03s, 1583.45m, 1444.58s, 1296.0m, 1203.5m, 844.76m, 727.11m.

**Synthesis of 2 :**

Compound **2** was prepared in similar way except that HTFA was replaced by perchloric acid. Cube shaped white crystals were obtained in 50% yield (based on H<sub>2</sub>MDP).

Anal.calcd (found) for C<sub>11</sub>H<sub>18</sub>Cl<sub>2</sub>N<sub>4</sub>O<sub>8</sub> (**2**): C, 32.61 (32.00); H, 4.48 (4.50); N, 13.83 (13.90); O, 31.59 (31.65); Cl, 17.50 (17.55).

IR (400-4000cm<sup>-1</sup>): 3417.63w, 2829.38w, 1585.38s, 1436.87w, 1265.22s, 1143.71s, 1112.85s, 1089.71s, 883.34w, 756.04m, 628.75s.

### Hydrogen bonding geometries in Form-A, Form-B, 1 and 2.

| Interaction                                           | <i>D</i> /Å | <i>d</i> /Å | <i>θ</i> /deg |
|-------------------------------------------------------|-------------|-------------|---------------|
| <b>Form-A</b>                                         |             |             |               |
| N <sub>1</sub> -H <sub>111</sub> .... N <sub>4</sub>  | 1.89(3)     | 2.913(2)    | 159(3)        |
| N <sub>3</sub> -H <sub>333</sub> .... N <sub>2</sub>  | 1.72(3)     | 2.860(2)    | 170(3)        |
| <b>Form-B</b>                                         |             |             |               |
| N <sub>1</sub> -H <sub>111</sub> .... N <sub>3</sub>  | 2.15(3)     | 2.9566(15)  | 156(3)        |
| N <sub>2</sub> -H <sub>222</sub> .... N <sub>2</sub>  | 2.10(3)     | 2.9306(16)  | 175(3)        |
| N <sub>3</sub> -H <sub>333</sub> .... N <sub>1</sub>  | 2.08(3)     | 2.9566(15)  | 173(3)        |
| N <sub>4</sub> -H <sub>444</sub> .... N <sub>4</sub>  | 2.10(3)     | 2.9538(17)  | 178(4)        |
| <b>Complex 1</b>                                      |             |             |               |
| N <sub>1</sub> -H <sub>111</sub> .... O <sub>4</sub>  | 1.71(4)     | 2.661(3)    | 173(3)        |
| N <sub>2</sub> -H <sub>222</sub> .... O <sub>1</sub>  | 1.84(3)     | 2.678(3)    | 171(4)        |
| N <sub>3</sub> -H <sub>333</sub> .... O <sub>3</sub>  | 1.77(3)     | 2.665(3)    | 173(3)        |
| N <sub>4</sub> -H <sub>444</sub> .... O <sub>2</sub>  | 1.80(4)     | 2.670(3)    | 174(4)        |
| C <sub>10</sub> -H <sub>10B</sub> .... O <sub>2</sub> | 2.58(4)     | 3.365(4)    | 150(3)        |
| <b>Complex 2</b>                                      |             |             |               |
| N <sub>1</sub> -H <sub>111</sub> .... O <sub>6</sub>  | 1.92(3)     | 2.767(3)    | 176(2)        |
| N <sub>2</sub> -H <sub>222</sub> .... O <sub>1</sub>  | 1.99(3)     | 2.786(2)    | 169(3)        |
| N <sub>3</sub> -H <sub>333</sub> .... O <sub>4</sub>  | 2.15(3)     | 2.823(3)    | 158(3)        |
| N <sub>4</sub> -H <sub>444</sub> .... O <sub>5</sub>  | 1.94(3)     | 2.753(3)    | 179(3)        |
| C <sub>9</sub> -H <sub>9B</sub> .... O <sub>7</sub>   | 2.369(2)    | 3.288(3)    | 160.09(14)    |
| C <sub>11</sub> -H <sub>11B</sub> .... O <sub>1</sub> | 2.563(2)    | 3.293(3)    | 132.95(15)    |

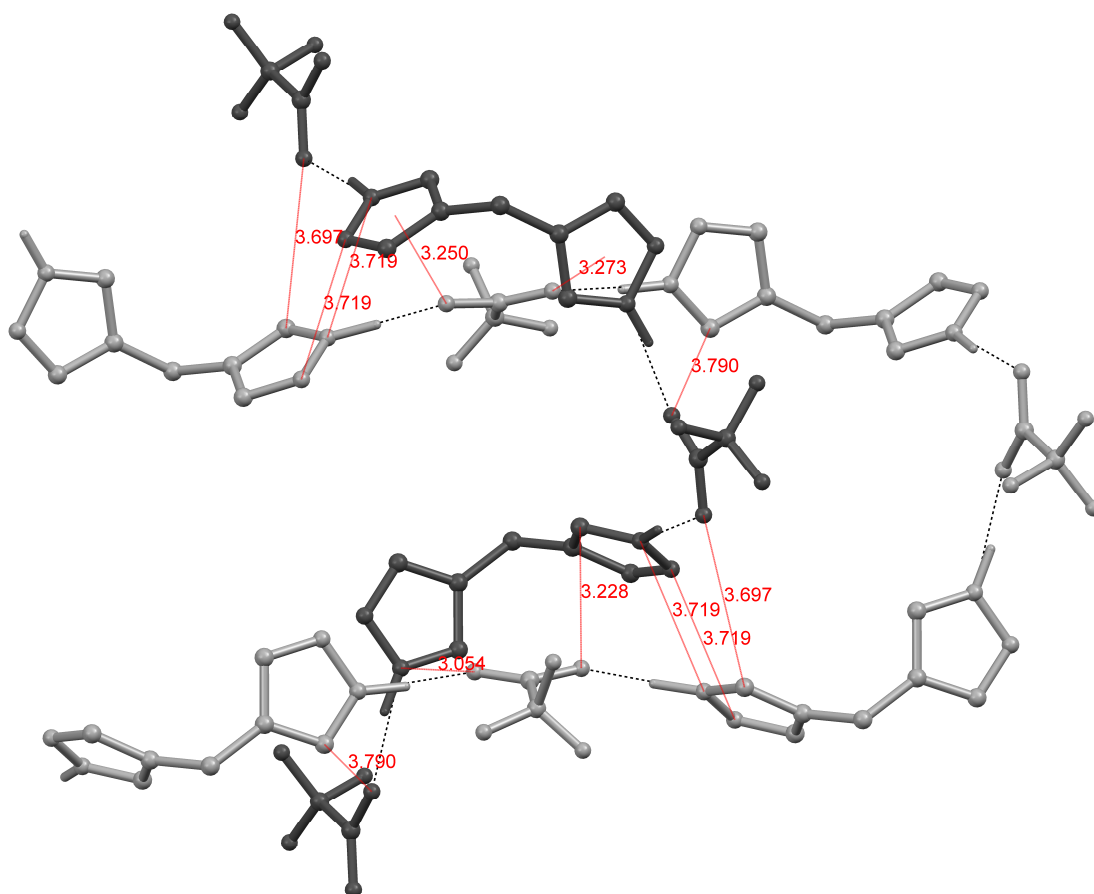

**Figure SI-1. Crystal structure of 1 showing anion- $\pi$  interactions and edge-to-edge  $\pi$ -stacking**

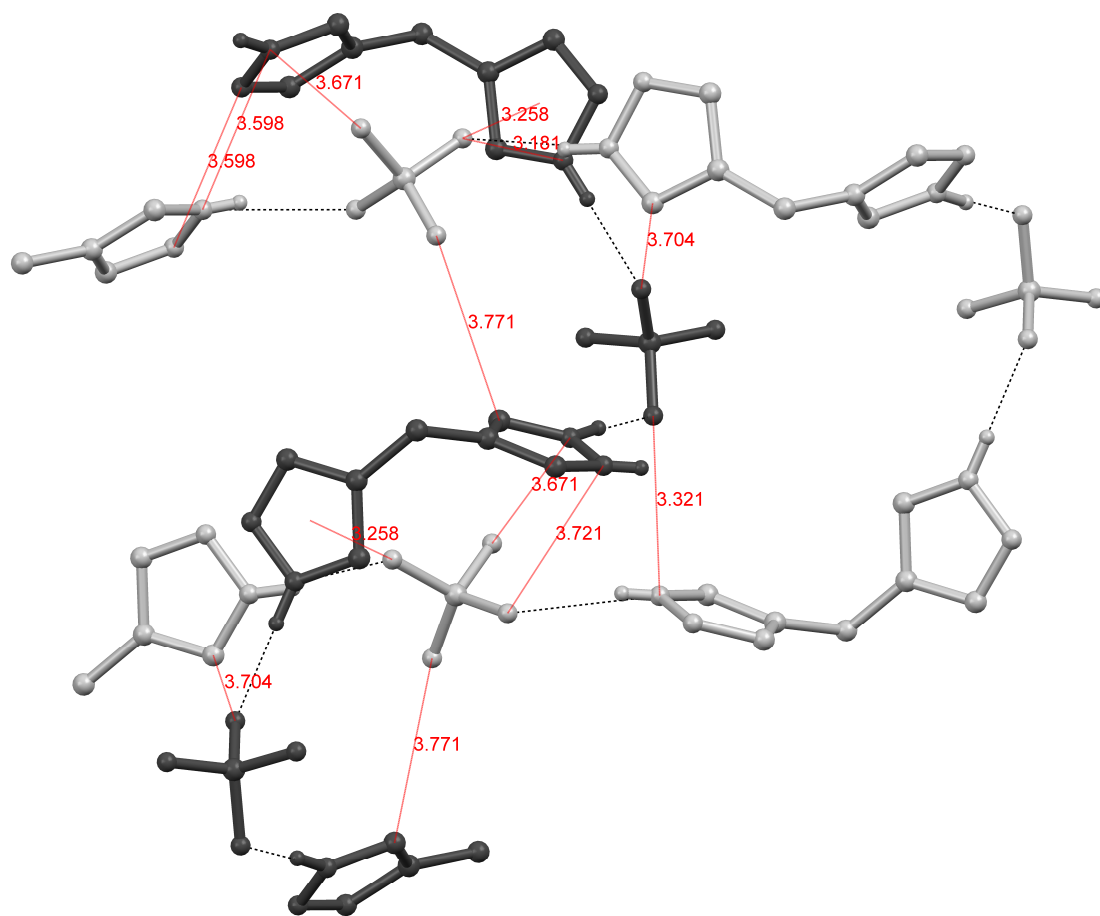

**Figure SI-2. Crystal structure of 2 showing anion- $\pi$  interactions and edge-to-edge  $\pi$ -stacking**
